# Supplementary material for: Nerve regeneration by human corneal stromal keratocytes and stromal fibroblasts
Source: PubMed Central journal article supplement (PMC5369053; doi:10.1038/srep45396), 2017-03-28
Supplement: srep45396-s1.pdf [file srep45396-s1.pdf]

# Nerve regeneration by human corneal stromal keratocytes and stromal fibroblasts

Gary Hin-Fai Yam, Geraint P Williams, Melina Setiawan, Nur Zaherah Binte M Yusoff, Xiao-wen Lee, Hla Myint Htoon, Lei Zhou, Matthias Fuest, Jodhbir S Mehta

## Supplementary Materials

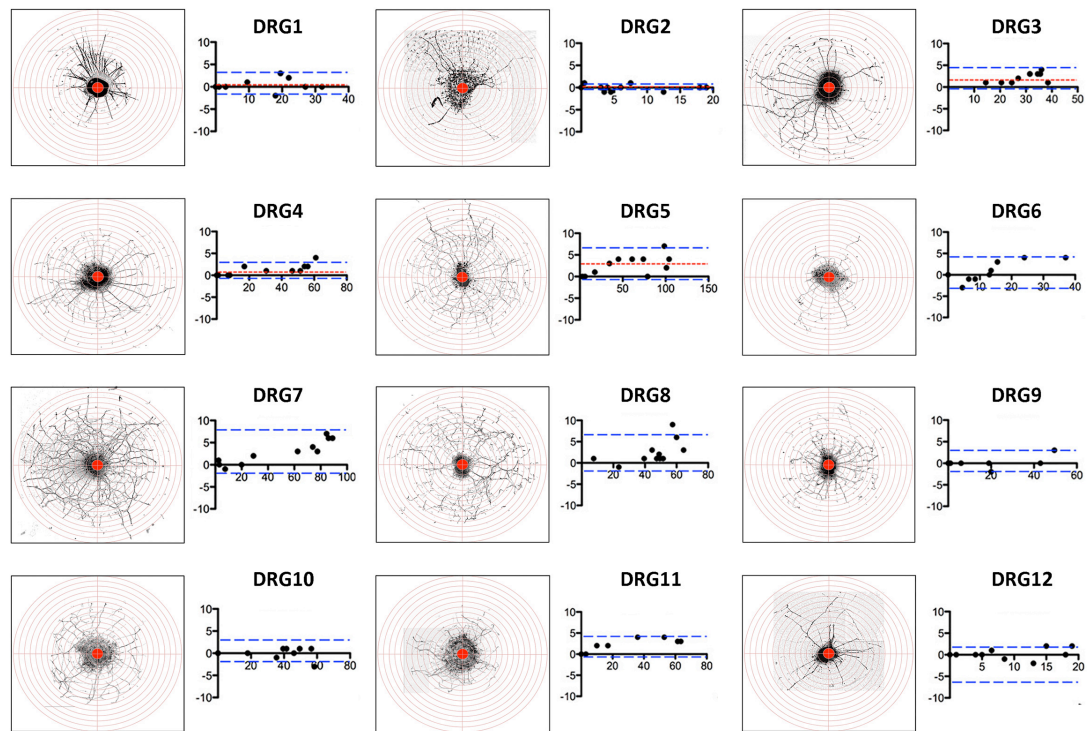

**Supplementary Figure 1.** Color photographs of neurite extension with concentric circle overlay for validation study (12 samples). Bland-Altman plots demonstrated inter-observer agreement. The upper and lower 95% limits of agreement from the mean difference (red hatched lines) were shown (defined as  $\pm 1.96$  SD [blue hatched lines]).

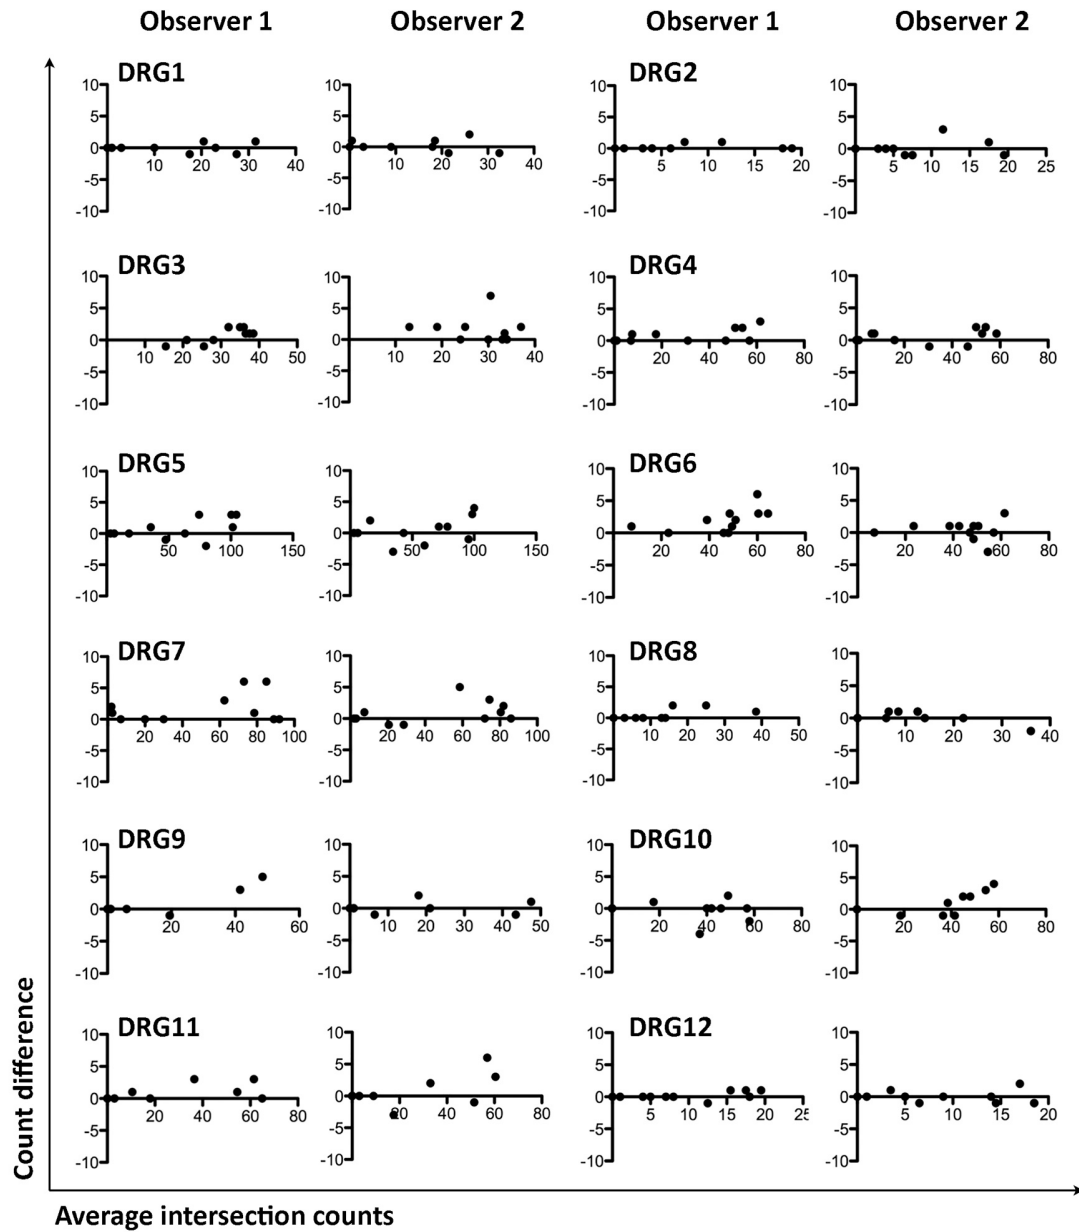

**Supplementary Figure 2. Intra-observer agreement for CCIC assay.** Comparison by Bland-Altman plots shown for Observer 1 and 2 demonstrated intra-observer agreement with quantification was repeated after 1 week for individual images.

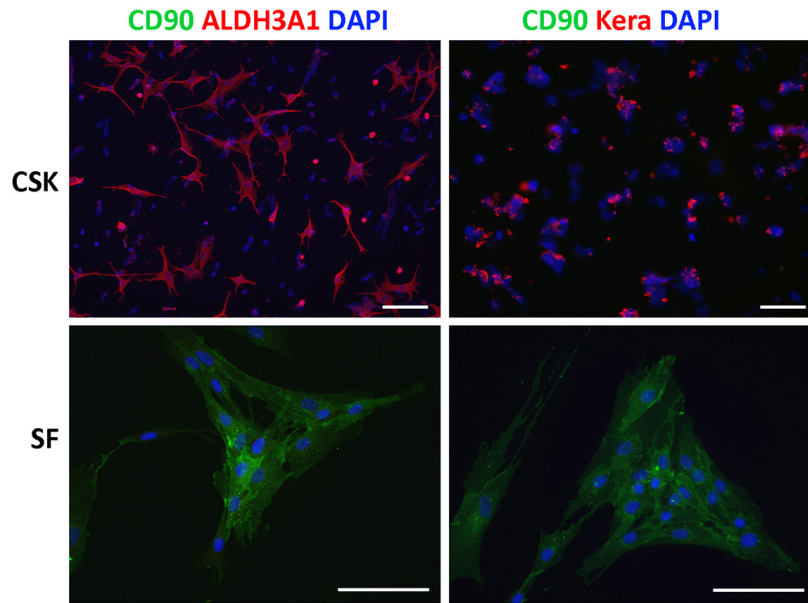

**Supplementary Figure 3. Marker expression in CSK and SF cultures after media conditioning.** CSK positively expressed ALDH3A1 and Kera (keratocan) but not CD90/Thy1. In contrast, SF expressed CD90 and was negative to CSK markers (ALDH3A1 and Kera). Scale bars: 50  $\mu$ m.

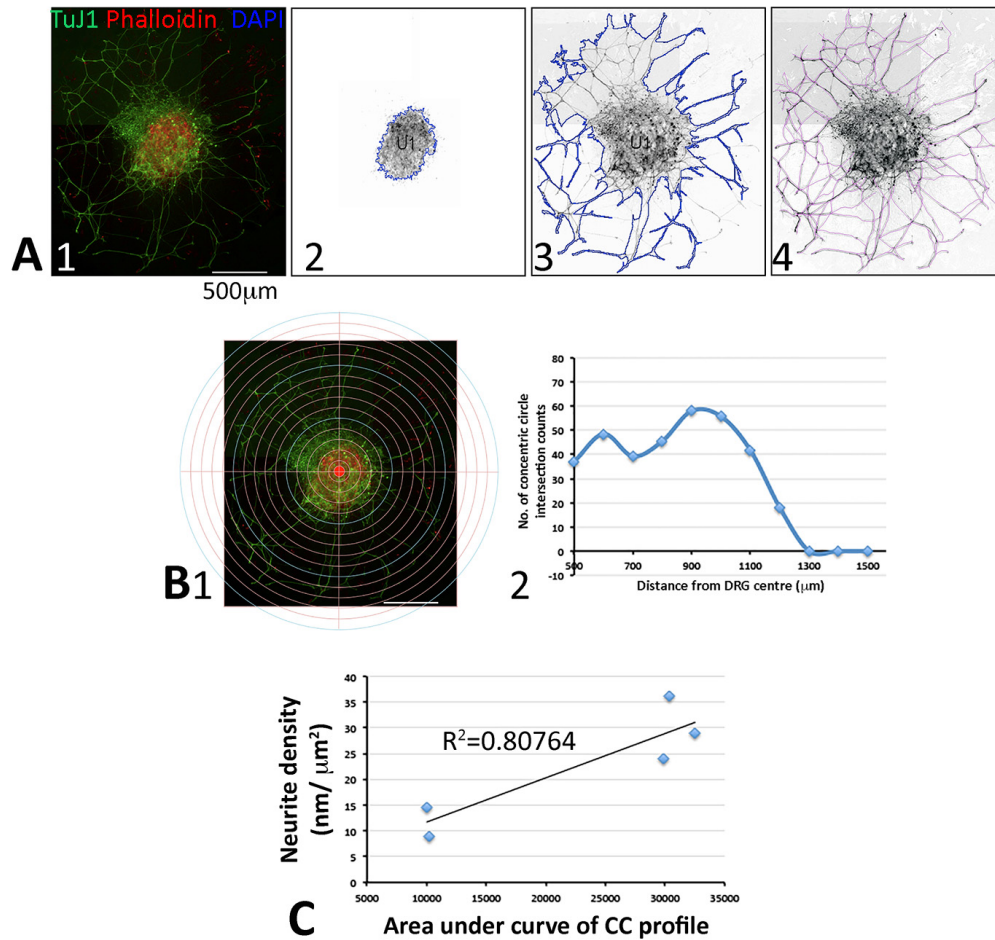

**Supplementary Figure 4. Comparison of neurite density assay with concentric circle intersection count method for neurite growth from DRG.**

**A. Neurite density assay.** DRG treated with 50 ng/ml NGF for 72 hours was fixed and processed for co- immunostaining with TuJ1 (green fluorescence) and phalloidin (red fluorescence) (**A1**). Fluorescence image was converted to grey scale and background non-neural cells were eliminated through colour value segmentation. Using Quantity One analysis (BioRad), the DRG tissue (**A2**) and total explant area (**A3**) were contoured and areas were measured. The neurite spanning area was calculated as the total explant area minus DRG tissue area. All extended neurites were traced (**A4**) and the total neurite length was measured by NeuronJ analysis (ImageJ plugin) (National Institute of Health, US). Neurite density was calculated by total

neurite length per unit neurite spanning area and represented as nm length per  $\mu\text{m}^2$  area.

**B. Concentric circle intersection count assay.** A series of concentric circles with radius increasing at 100  $\mu\text{m}$  and spanning from 500 to 1500  $\mu\text{m}$  range were overlaid on the explant image and aligned to the DRG centre (**B1**). The number of neurites intersecting with each circle line along the distance from DRG centre was manually quantified by two independent observers and each observer counted twice on 2 consecutive days. The neurite extension profile was plotted with the mean number of intersections against distance from the DRG centre (**B2**) and the Area Under Curve (AUC) was calculated.

**C.** Scatter plot of AUC of CC profile (x-axis) versus neurite density (y-axis) of 5 DRG explants. The best-fit linear line showed  $r^2 = 0.80764$ , indicating a moderate to high linear correlation of these 2 parameters from independent methods.

| <b>Estimates</b> |       |            |                              |       |
|------------------|-------|------------|------------------------------|-------|
| cat              | Mean  | Std. Error | 95% Wald Confidence Interval |       |
|                  |       |            | Lower                        | Upper |
| control          | 4.03  | .479       | 3.19                         | 5.09  |
| CSK 30%          | 1.96  | .257       | 1.52                         | 2.54  |
| CSK 60%          | 2.09  | .380       | 1.46                         | 2.98  |
| CSK 90%          | 3.56  | .664       | 2.47                         | 5.14  |
| SF 30%           | 7.50  | 1.536      | 5.02                         | 11.20 |
| SF 60%           | 12.23 | 2.280      | 8.49                         | 17.63 |
| SF 90%           | 15.15 | 2.295      | 11.26                        | 20.39 |

### Overall Test Results

| Wald Chi-Square | df | Sig. |
|-----------------|----|------|
| 53.644          | 6  | .000 |

The Wald chi-square tests the effect of cat. This test is based on the linearly independent pairwise comparisons among the estimated marginal means.

**Supplementary Table 1.** Independent variance structure with the corrected quasi-likelihood under independence model criterion (QICC) values to compare different CM dosages (the lower QICC the better model fitting) and the estimated marginal means.

**Supplementary Table 2. Proteins list identified in conditioned media from human CSKs and SFs by nanoLC-MS/MS analysis**

|                                                            | <b>%</b>        | <b>Accession</b> | <b>Protein name</b>                                      | <b>Peptides</b> |
|------------------------------------------------------------|-----------------|------------------|----------------------------------------------------------|-----------------|
|                                                            | <b>Coverage</b> | <b>#</b>         |                                                          | <b>(95%)</b>    |
| <b><i>A. Proteins commonly found in CSKCM and SFCM</i></b> |                 |                  |                                                          |                 |
| 1                                                          | 31.4            | P04264           | KRT1 Keratin 1                                           | 29              |
| 2                                                          | 31.7            | P13645           | KRT10 Keratin 10                                         | 27              |
| 3                                                          | 26              | P35908           | KRT2, Keratin 2                                          | 20              |
| 4                                                          | 29.5            | P07585           | DCN Decorin                                              | 15              |
| 5                                                          | 20.1            | P36955           | SERPINF1 Pigment epithelium-derived factor               | 9               |
| 6                                                          | 10.8            | P08123           | COL1A2 Collagen $\alpha$ 2(I) chain                      | 12              |
| 7                                                          | 20.4            | P51884           | LUM Lumican                                              | 10              |
| 8                                                          | 24              | P01138           | NGF Nerve growth factor                                  | 12              |
| 9                                                          | 13.7            | P02452           | COL1A1 Collagen $\alpha$ 1(I) chain                      | 18              |
| 10                                                         | 12              | P35527           | KRT9 Keratin 9                                           | 14              |
| 11                                                         | 12.8            | O60938           | KERA Keratocan                                           | 7               |
| 12                                                         | 14.9            | P09486           | SPARC                                                    | 6               |
| 13                                                         | 8.9             | Q16610           | ECM1 Extracellular matrix protein 1                      | 6               |
| 14                                                         | 8               | P12109           | COL6A1 Collagen $\alpha$ 1(VI) chain                     | 8               |
| 15                                                         | 13.3            | P01857           | IGHG1 Ig $\gamma$ 1 chain C region                       | 4               |
| 16                                                         | 25.8            | P41222           | PTGDS Prostaglandin-H2 D-isomerase                       | 7               |
| 17                                                         | 19.2            | P01034           | CST3 Cystatin-C                                          | 3               |
| 18                                                         | 3.7             | P00751           | CFB Complement factor B                                  | 3               |
| 19                                                         | 9.6             | P01876           | IGHA1 Ig $\alpha$ 1 chain C region                       | 3               |
| 20                                                         | 7.8             | P10909           | CLU Clusterin                                            | 3               |
| 21                                                         | 3.8             | P02768           | ALB Serum albumin                                        | 2               |
| 22                                                         | 4.3             | P35443           | THBS4 Thrombospondin-4                                   | 3               |
| 23                                                         | 11.6            | P05090           | APOD Apolipoprotein D                                    | 2               |
| 24                                                         | 2.8             | P09871           | C1S Complement C1s                                       | 2               |
| 25                                                         | 9.8             | P01859           | IGHG2 Ig $\gamma$ 2 chain C region                       | 3               |
| 26                                                         | 0.8             | Q99715           | COL12A1 Collagen $\alpha$ 1(XII) chain                   | 2               |
| 27                                                         | 4               | P07477           | PRSS1 Trypsin-1                                          | 5               |
| 28                                                         | 5.3             | P13647           | KRT5 Keratin 5                                           | 4               |
| 29                                                         | 2.5             | P00738           | HP Haptoglobin                                           | 1               |
| 30                                                         | 2.9             | Q9UBP4           | DKK3 Dickkopf-related protein 3                          | 1               |
| 31                                                         | 0.6             | Q99666           | RGPD5 RANBP2-like and GRIP domain-containing protein 5/6 | 1               |
| 32                                                         | 3.3             | Q15113           | PCOLCE Procollagen C-endopeptidase enhancer 1            | 1               |
| 33                                                         | 3.2             | Q06828           | FMOD Fibromodulin                                        | 1               |

|    |      |        |                                      |   |
|----|------|--------|--------------------------------------|---|
| 34 | 10.6 | P69905 | HBA1 Hemoglobin subunit $\alpha$     | 1 |
| 35 | 6.7  | P61769 | B2M $\beta$ 2-microglobulin          | 1 |
| 36 | 2.7  | P21810 | BGN Biglycan                         | 1 |
| 37 | 6.8  | P16035 | TIMP2 Metalloproteinase inhibitor 2  | 1 |
| 38 | 4.4  | P06733 | ENO $\alpha$ -enolase                | 1 |
| 39 | 2.2  | P05156 | CFI Complement factor I              | 1 |
| 40 | 12.7 | P24821 | TNC Tenascin C                       | 1 |
| 41 | 5.8  | P01033 | TIMP1 Metalloproteinase inhibitor 1  | 1 |
| 42 | 3    | P00338 | LDHA L-lactate dehydrogenase A chain | 1 |
| 43 | 0.3  | P12111 | COL6A3 Collagen $\alpha$ 3(VI) chain | 1 |

---

***B. Proteins in CSKCM only***

---

|   |      |        |                                                            |   |
|---|------|--------|------------------------------------------------------------|---|
| 1 | 12.3 | P02533 | KRT14 Keratin 14                                           | 6 |
| 2 | 3.5  | Q14624 | ITIH4 Inter- $\alpha$ -trypsin inhibitor heavy chain H4    | 2 |
| 3 | 1.8  | P08582 | MFI2 Melanotransferrin                                     | 3 |
| 4 | 1.5  | Q9P1V8 | SAMD15 Sterile $\alpha$ motif domain-containing protein 15 | 1 |
| 5 | 0.8  | P49917 | LIG4 DNA ligase 4                                          | 1 |
| 6 | 0.9  | P08603 | CFH Complement factor H                                    | 1 |

---

***C. Proteins in SFCM only***

---

|    |      |        |                                                      |    |
|----|------|--------|------------------------------------------------------|----|
| 1  | 14.8 | P02751 | FN1 Fibronectin                                      | 32 |
| 2  | 17.6 | P05997 | COL5A2 Collagen $\alpha$ 2(V) chain                  | 35 |
| 3  | 33.5 | P08670 | VIM Vimentin                                         | 14 |
| 4  | 16.8 | Q15582 | TGFBI TGF $\beta$ -induced protein ig-h3             | 11 |
| 5  | 31.1 | P18065 | IGFBP2 Insulin-like growth factor-binding protein 2  | 12 |
| 6  | 17.1 | Q02818 | NUCB1 Nucleobindin-1                                 | 8  |
| 7  | 8.3  | P12110 | COL6A2 Isoform 2C2A of Collagen $\alpha$ 2(VI) chain | 9  |
| 8  | 14.6 | P08253 | MMP2 72 kDa type IV collagenase                      | 7  |
| 9  | 5.8  | P07996 | THBS1 Thrombospondin-1                               | 6  |
| 10 | 9    | P48668 | KRT6C Keratin 6C                                     | 6  |
| 11 | 15.6 | Q12841 | FSTL1 Follistatin-related protein 1                  | 6  |
| 12 | 8.9  | O43852 | CALU Calumenin                                       | 4  |
| 13 | 4.6  | O94985 | CLSTN1 Calsyntenin-1                                 | 4  |
| 14 | 21.3 | P22692 | IGFBP4 Insulin-like growth factor-binding protein 4  | 6  |
| 15 | 11.8 | P08779 | KRT16 Keratin 16                                     | 6  |
| 16 | 9.9  | Q9Y240 | CLEC11A C-type lectin domain family 11 member A      | 3  |



|    |      |          |                                                                        |   |
|----|------|----------|------------------------------------------------------------------------|---|
| 17 | 7.9  | Q9UBR2   | CTSZ Cathepsin Z                                                       | 4 |
| 18 | 8.3  | sQ92743  | Serine protease HTRA1                                                  | 3 |
| 19 | 0.9  | P98160   | HSPG2 Heparan sulfate proteoglycan core protein                        | 3 |
| 20 | 10.3 | P24593   | IGFBP5 Insulin-like growth factor-binding protein 5                    | 3 |
| 21 | 2.6  | P14543   | NID1 Nidogen-1                                                         | 3 |
| 22 | 9    | O43827   | ANGPTL7 Angiopoietin-related protein 7                                 | 3 |
| 23 | 8.3  | O95965   | ITGBL1 Integrin $\beta$ -like protein 1                                | 3 |
| 24 | 12.3 | P20366   | TAC1, Tachykinin precursor 1                                           | 3 |
| 25 | 8.5  | P06753-6 | TPM3 Isoform 6 of Tropomyosin $\alpha$ 3 chain                         | 3 |
| 26 | 5.1  | P00736   | C1R Complement                                                         | 5 |
| 27 | 4.4  | O00391   | QSOX1 Sulfhydryl oxidase 1                                             | 3 |
| 28 | 9.4  | P26022   | PTX3 Pentraxin-related protein                                         | 3 |
| 29 | 3.3  | Q8TB73   | NDNF                                                                   | 2 |
| 30 | 1.9  | Q8IUX7   | AEBP1 Adipocyte enhancer-binding protein 1                             | 2 |
| 31 | 2.6  | Q7Z7G0   | ABI3BP Target of Nesh-SH3                                              | 2 |
| 32 | 4.7  | P05121   | SERPINE1 Plasminogen activator inhibitor 1                             | 2 |
| 33 | 35.9 | P01834   | IGKC Ig kappa chain C region                                           | 2 |
| 34 | 7.3  | P01308   | INS Insulin                                                            | 3 |
| 35 | 3.3  | O60568   | PLOD3 Procollagen-lysine,2-oxoglutarate 5-dioxygenase 3                | 2 |
| 36 | 1.9  | Q13822   | ENPP2 Ectonucleotide pyrophosphatase/phosphodiesterase family member 2 | 2 |
| 37 | 9.4  | P63104   | YWHAZ 14-3-3 protein zeta/delta                                        | 2 |
| 38 | 5.3  | P02461   | COL3A1 Collagen $\alpha$ 1(III) chain                                  | 8 |
| 39 | 8.5  | P67936   | TPM4 Tropomyosin $\alpha$ 4 chain                                      | 3 |
| 40 | 2    | P35442   | THBS2 Thrombospondin-2                                                 | 2 |
| 41 | 6.7  | P62937   | PPIA Peptidyl-prolyl cis-trans isomerase A                             | 1 |
| 42 | 5.5  | P55001   | MFAP2 Microfibrillar-associated protein 2                              | 1 |
| 43 | 1.1  | P11047   | LAMC1 Laminin subunit $\gamma$ 1                                       | 1 |
| 44 | 2.3  | Q9P0M2   | AKAP7 A-kinase anchor protein 7 isoform $\gamma$                       | 1 |
| 45 | 0.3  | Q9NYQ8   | FAT2 Protocadherin Fat 2                                               | 1 |
| 46 | 3.7  | Q9NRN5   | OLFML3 Olfactomedin-like protein 3                                     | 1 |
| 47 | 3.2  | Q9GZP0   | PDGFD Platelet-derived growth factor                                   | 1 |

## D

|    |      |        |                                                                   |   |
|----|------|--------|-------------------------------------------------------------------|---|
| 48 | 3.3  | Q9BRK5 | SDF4 45 kDa calcium-binding protein                               | 1 |
| 49 | 3.3  | Q96CG8 | CTHRC1 Collagen triple helix repeat-containing protein 1          | 1 |
| 50 | 1.5  | Q96AY3 | FKBP10 Peptidyl-prolyl cis-trans isomerase                        | 1 |
| 51 | 5.3  | Q92520 | FAM3C                                                             | 1 |
| 52 | 0.9  | Q8TCG1 | KIAA1524 Protein CIP2A                                            | 1 |
| 53 | 2.2  | Q8NBJ4 | GOLM1 Golgi membrane protein 1                                    | 1 |
| 54 | 2.4  | Q6SA08 | TSSK4 Testis-specific serine/threonine-protein kinase 4           | 1 |
| 55 | 0.6  | Q14767 | LTBP2 Latent-TGF $\beta$ -binding protein 2                       | 1 |
| 56 | 3    | Q12805 | EFEMP1 EGF-containing fibulin-like extracellular matrix protein 1 | 1 |
| 57 | 2.1  | Q08380 | LGALS3BP Galectin-3-binding protein                               | 1 |
| 58 | 5.5  | Q06830 | PRDX1 Peroxiredoxin-1                                             | 1 |
| 59 | 1.5  | Q02809 | PLOD1 Procollagen-lysine,2-oxoglutarate 5-dioxygenase 1           | 1 |
| 60 | 2.1  | P80303 | NUCB2 Nucleobindin-2                                              | 1 |
| 61 | 6.6  | P61916 | NPC2 Epididymal secretory protein E1                              | 1 |
| 62 | 4.2  | P60174 | TPI1 Triosephosphate isomerase                                    | 1 |
| 63 | 2.1  | P51888 | PRELP Prolargin                                                   | 1 |
| 64 | 0.2  | P35556 | FBN2 Fibrillin-2                                                  | 1 |
| 65 | 5.7  | P31946 | YWHAB 14-3-3 protein beta/alpha                                   | 1 |
| 66 | 1.3  | P30530 | AXL Tyrosine-protein kinase receptor UFO                          | 1 |
| 67 | 2.8  | P30101 | PDIA3 Protein disulfide-isomerase A3                              | 1 |
| 68 | 1.4  | P29401 | TKT Transketolase                                                 | 1 |
| 69 | 2.9  | P29279 | CTGF Connective tissue growth factor                              | 1 |
| 70 | 5.4  | P24592 | IGFBP6 Insulin-like growth factor-binding protein 6               | 1 |
| 71 | 4.2  | P23284 | PPIB Peptidyl-prolyl cis-trans isomerase B                        | 1 |
| 72 | 2    | P23142 | FBLN1 Fibulin-1                                                   | 1 |
| 73 | 3    | P20774 | OGN Mimecan                                                       | 1 |
| 74 | 1.3  | P16070 | CD44                                                              | 1 |
| 75 | 2.2  | P11279 | LAMP1 Lysosome-associated membrane glycoprotein 1                 | 1 |
| 76 | 14.2 | P0CG06 | IGLC3 Ig lambda-3 chain C regions                                 | 1 |
| 77 | 11.1 | P09382 | LGALS1 Galectin-1                                                 | 1 |

|    |      |        |                                                                        |   |
|----|------|--------|------------------------------------------------------------------------|---|
| 78 | 10.7 | P08493 | MGP Matrix Gla protein                                                 | 1 |
| 79 | 4.5  | P04406 | GAPDH Glyceraldehyde-3-phosphate dehydrogenase                         | 1 |
| 80 | 6.5  | P00441 | SOD1 Superoxide dismutase [Cu-Zn]                                      | 1 |
| 81 | 1.8  | O95967 | EFEMP2 EGF-containing fibulin-like extracellular matrix protein 2      | 1 |
| 82 | 3    | O14498 | ISLR Immunoglobulin superfamily containing leucine-rich repeat protein | 1 |
| 83 | 2.4  | O00622 | CYR61                                                                  | 1 |
| 84 | 0.6  | Q9ULK4 | MED23 Mediator of RNA polymerase II transcription subunit 23           | 1 |
| 85 | 1.2  | Q14246 | ADGRE1 Adhesion G protein-coupled receptor E1                          | 1 |
| 86 | 12.3 | P63261 | ACTG1 Actin $\gamma$ 1                                                 | 3 |
| 87 | 10.3 | P23083 | Ig heavy chain V-I region V35                                          | 1 |
| 88 | 1.3  | Q5T3F8 | TMEM63B CSC1-like protein 2                                            | 1 |

---

**Supplementary Table 3.** Donor cornea information

| <b>Donor</b> | <b>Age</b> | <b>Gender</b> | <b>Cause of death</b> | <b>Preservation in Optisol<br/>before cell culture<br/>(days)</b> |
|--------------|------------|---------------|-----------------------|-------------------------------------------------------------------|
| 1            | 13         | F             | Gun shot death        | 12                                                                |
| 2            | 21         | M             | Bowel obstruction     | 9                                                                 |
| 3            | 18         | M             | Pulmonary fibrosis    | 9                                                                 |
| 4            | 64         | F             | Heart failure         | 8                                                                 |
| 5            | 50         | M             | Hepatocellular cancer | 6                                                                 |
| 6            | 35         | M             | Aspiration pneumonia  | 8                                                                 |

F: female; M: male

**Supplementary Table 4.** Primary antibodies used in this study

| <b>Antibody</b>                   | <b>Source</b> | <b>Application</b> | <b>Remarks</b>                 |
|-----------------------------------|---------------|--------------------|--------------------------------|
| TuJ1                              | Santa Cruz    | 0.5 µg/ml          |                                |
| Lumican                           | Sigma         | 1 µg/ml            | Endo-β-galactosidase treatment |
| ALDH3A1                           | Proteintech   | 1 µg/ml            | Methanol pre-treatment         |
| CD90 (Thy1)                       | Millipore     | 1 µg/ml            |                                |
| Fibroblast 5B5                    | Novus Biol    | 0.5 µg/ml          |                                |
| α-SMA                             | DAKO          | 1 µg/ml            | Ice-cold acetone fixation      |
| Fluorescein conjugated-phalloidin | Invitrogen    | 0.5 µg/ml          |                                |

**Supplementary Table 5. Gene expression primers**

|    | <b>Gene</b> | <b>GeneBank<br/>Accession No.</b> | <b>Sequences (5'-3')</b>                                   | <b>Product size<br/>(bp)</b> |
|----|-------------|-----------------------------------|------------------------------------------------------------|------------------------------|
| 1  | AcvR1       | NM_001105.4                       | F: CTGGCCAAGCCGTGGAGTGCTGCC<br>R: GTACTGGAGTGTCTTGATGTCATG | 571                          |
| 2  | BGN         | NM_001711.4                       | F: GAGGACCTGCTTCGCTACTC<br>R: CCCTGGCCAACCTTGTGTGTTG       | 136                          |
| 3  | ENO2        | NM_001975.2                       | F: GTGTCTCTGGCCGTGTGTAA<br>R: TCTCCAGGATATTGGGGGCA         | 319                          |
| 4  | GAPDH       | NM_002046.3                       | F: GAACATCATCCCTGCATCCA<br>R: CCAGTGAGCTTCCCGTTCA          | 226                          |
| 5  | IL4         | BC_067514.1                       | F: ACTTTGAACAGCCTCACAGAG<br>R: TTGGAGGCAGCAAAGATGTC        | 172                          |
| 6  | ITGA5       | NM_002205.3                       | F: TGCTGGACTGTGGAGAAGACAACA<br>R: TCTGGGCATGGAAAGTGAGGTTCA | 120                          |
| 7  | KERA        | NM_007035.3                       | F: CAGGAGAAACAGGGCCTACAGA<br>R: TCCAGCTTGGGGTCTGAA         | 191                          |
| 8  | LUM         | NM_002345.3                       | F: CCTGGTTGAGCTGGATCTGT<br>R: TGGTTTCTGAGATGCGATTG         | 194                          |
| 9  | MCP1/CCL2   | NM_002982.3                       | F: GCCTCCAGCATGAAAGTCTC<br>R: AGGTGACTGGGGCATTGAT          | 99                           |
| 10 | MMP2        | NM_004530.5                       | F: GGCCCTGTCACTCCTGAGAT<br>R: GGCATCCAGGTTATCGGGGA         | 437                          |
| 11 | Sema3f      | NM_004186.3                       | F: AGCAGACCCAGGACGTGAG<br>R: AAGACCATGCGAATATCAGCC         | 145                          |
| 12 | TAC/SP      | NM_013996.2                       | F: GGTACGACAGCGACCAGATCA<br>R: CCCGTTTGCCCATTAATCCA        | 112                          |
| 13 | TGFBI       | NM_000660.5                       | F: CCCAGCATCTGCAAAGCTC<br>R: GTCAATGTACAGCTGCCGCA          | 101                          |
| 14 | TIMP1       | NM_003254.2                       | F: TTTTGTGGCTCCCTGGAACA<br>R: GGACTGGAAGCCTTTTTCAGA        | 184                          |
| 15 | TNC         | NM_002160.3                       | F: GGCTACCGATGGGATCTTCG<br>R: GTCCAGCAGCTTCCCAGAAT         | 337                          |
